# Supplementary material for: A potentiometric biosensing system based on an isolated degrading bacterium Klebsiella sp. MP-6 for the determination of methyl parathion
Source: Royal Society of Chemistry journal article supplement (doi:10.1039/c5ra00263j), 2015-01-01
Supplement: c5ra00263j1.pdf [file c5ra00263j1.pdf]

## Supporting Information

### Potentiometric biosensing system based on an isolated degrading bacterium

#### *Klebsiella* sp. MP-6 for the determination of methyl parathion

Fangfang Geng,<sup>†ab</sup> Jiawang Ding,<sup>†b</sup> Cuiying Jia,<sup>a</sup> Baojun Ding<sup>\*a</sup> and Wei Qin<sup>\*b</sup>

<sup>a</sup>*School of Chemistry, Dalian University of Technology, Dalian, Liaoning 116024, P.R. China.  
Fax: +86411 84741371 Tel: +86411 84986351; E-mail: dingbj@dlut.edu.cn*

<sup>b</sup>*Key Laboratory of Coastal Environmental Processes and Ecological Remediation, Yantai Institute of Coastal Zone Research (YIC), Chinese Academy of Sciences (CAS); Shandong Provincial Key Laboratory of Coastal Environmental Processes, YICCAS, Yantai, Shandong 264003, P.R. China. Fax: +86535 2109000 Tel: +86535 2109153; E-mail: wqin@yic.ac.cn*

<sup>†</sup> *Both authors contributed equally to this work.*

<sup>\*</sup>Corresponding author. Tel: +86-411-84986351, Fax: +86-411-84741371 (B. J. Ding); Tel.: +86-535-2109156, Fax: +86-535-2109000 (W. Qin)

E-mail address: dingbj@dlut.edu.cn (B. J. Ding); wqin@yic.ac.cn (W. Qin)

### ***Optimization of the MISPE for preconcentration of MP***

The pretreatment processes with MISPE were optimized in terms of the eluting solvent, eluent volume and amount of sorbent to obtain a higher sensitivity. The effect of the eluting solvent on the recovery of methyl parathion (MP) was studied. It can be seen that with acetonitrile as eluting solvent, the recovery of methyl parathion is the highest (Fig. S1a). The most likely reason is that the polarity of acetonitrile is suitable to dissolve methyl parathion, thus effectively reducing the hydrogen-bonding and/or hydrophobic interactions between the MIP and the template (i.e., methyl parathion). To optimize the eluting volume, different volumes of acetonitrile were used (Fig. S1b). The results show that by increasing the solvent volume from 2 mL to 10 mL, the recovery of MP extracted increases from 22% to 90%. The high-efficiency elution can be observed at the eluting volume of 10 mL. When the eluting volume is further increased, the recovery cannot be increased significantly. Thus, 10 mL was selected as the optimum eluting volume for MISPE. In order to obtain the higher extraction efficiency, different amounts of the sorbent were compared (Fig. S1c). As shown in Fig. 6c, the recoveries are lower with 10 mg and 20 mg sorbent due to the less binding sites in the extracting material. The higher recovery could be obtained with 30 mg sorbent. At loading amounts higher than 30 mg, the recovery would not increase any more probably due to the saturation of the binding sites.

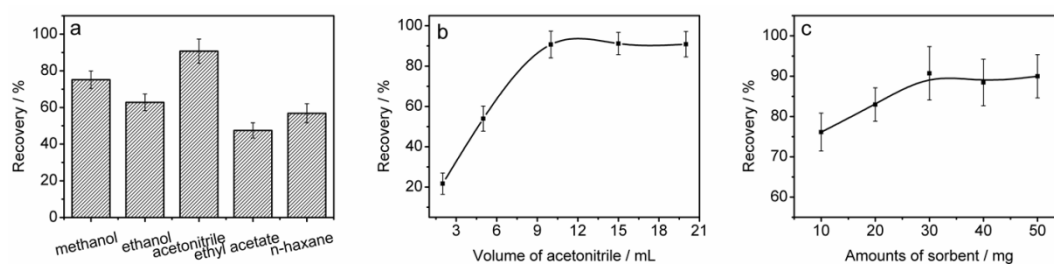

Fig. S1 Recoveries of MP obtained with (a) different eluting solvents, (b) different eluting volumes and (c) different amounts of sorbent. Unless stated otherwise, the extraction conditions were as follows: 30 mg MIP sorbent, 10 mL methanol for conditioning, 100 mL sample, 10 mL ultrapure water for washing, and 10 mL acetonitrile as eluent.
